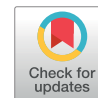

## Issues and Events

### COVID-19 AND DIABETES: RESOURCE WEBPAGE

The American Diabetes Association is dedicated to ensuring that you stay informed of the latest COVID-19 research and guidelines. Our new online page for diabetes professionals includes essential resources and information—including webinars, patient guidance, relevant news articles, a discussion forum, and more. Follow updates and join the conversation at [professional.diabetes.org/content-page/covid-19](https://professional.diabetes.org/content-page/covid-19).

### INTERNATIONAL CONSENSUS STATEMENT TRANSLATIONS

International Consensus Statement “Clinical Targets for Continuous Glucose Monitoring Data Interpretation: Recommendations From the International Consensus on Time in Range” is now available in six languages: English, French, Italian, Spanish, German, and Japanese. This important article provides evidence-based guidelines for continuous glucose monitoring (CGM), as determined by an international panel of diabetes experts striving for consistent parameters for CGM blood glucose goals in both research and clinical settings. Access the study in all languages at [care.diabetesjournals.org/content/time-in-range-translations](https://care.diabetesjournals.org/content/time-in-range-translations).

### CLINICAL DIABETES DIGITAL PUBLICATION

In a series of short videos now available on the *Clinical Diabetes* website, an expert panel moderated by John Anderson, MD, discusses approaches to optimizing basal insulin initiation and treatment in people with type 2 diabetes, including those at high risk such as individuals with renal impairment and older adults, with a focus on reaching A1C goals while mitigating the risk for hypoglycemia. An executive summary and videos of the full panel can be found at [clinical.diabetesjournals.org/content/basal-insulin-videos](https://clinical.diabetesjournals.org/content/basal-insulin-videos).

### SPECIAL PODCAST SERIES: DIABETES AND INFLUENZA

This special three-episode series (made possible by an unrestricted educational grant from Sanofi Pasteur) explores the complicated relationship between diabetes and influenza. In

each episode, Drs. Neil Skolnik and John Russell present and discuss the latest clinically relevant articles and information related to the impact of diabetes on influenza-related mortality rates, influenza-related complications in persons with diabetes, and the important role clinicians can play in encouraging patients with diabetes to get their annual influenza vaccination. To listen to the ongoing series, visit [diabetesjournals.org/content/influenza-podcasts](https://diabetesjournals.org/content/influenza-podcasts).

### IDF DIABETES COMPLICATIONS CONGRESS 2020

The International Diabetes Federation (IDF) Diabetes Complications Congress 2020 will take place in Lisbon, Portugal, on 3–5 December 2020. This is the second in a new IDF series of live educational events focused on tackling the issues around complications associated with diabetes. For details about the program and registration, visit <https://idf.org/our-activities/congress/idf-complications-congress-2020>.

### CLINICAL DIABETES: CALL FOR COVER IMAGES

The editors of *Clinical Diabetes* invite you to submit images for use on the cover of *Clinical Diabetes*. Cover image submission and selection is completely independent of article submission and the peer-review process. Images sent for consideration on the cover are not required to be related to an article submitted to or published in the journal. For more information, visit [clinical.diabetesjournals.org/content/images-wanted-cover-clinical-diabetes](https://clinical.diabetesjournals.org/content/images-wanted-cover-clinical-diabetes).

### STANDARDS OF MEDICAL CARE IN DIABETES—2020

American Diabetes Association “Standards of Medical Care in Diabetes” is based on a complete review of the relevant literature by a diverse group of highly trained clinicians and researchers. After weighing the quality of evidence, from rigorous double-blind clinical trials to expert opinion, recommendations are drafted, reviewed, and submitted for approval to the American Diabetes Association Executive Committee. To see the 2020 Standards, please visit [professional.diabetes.org/SOC](https://professional.diabetes.org/SOC).
